# Supplementary material for: Success of cuckoo catfish brood parasitism reflects coevolutionary history and individual experience of their cichlid hosts
Source: PubMed Central journal article supplement — Sci Adv. 2018 May 2;4(5):eaar4380. doi: 10.1126/sciadv.aar4380 (PMC5931752; doi:10.1126/sciadv.aar4380), 2018-05-02
Supplement: aar4380_SM.pdf [file aar4380_SM.pdf]

## Supplementary Materials for

### **Success of cuckoo catfish brood parasitism reflects coevolutionary history and individual experience of their cichlid hosts**

Radim Blažek, Matej Polačik, Carl Smith, Marcel Honza, Axel Meyer, Martin Reichard

Published 2 May 2018, *Sci. Adv.* **4**, ear4380 (2018)

DOI: 10.1126/sciadv.aar4380

#### **The PDF file includes:**

- fig. S1. The cost of experimental parasitism in terms of the size of host own brood.
- table S1. Full analysis of variance (ANOVA) table for a Bernoulli GLM to test the roles of evolutionary experience and individual experience on rejection of parasite eggs over the first 24 hours.
- table S2. The results of a Bernoulli GLM to test the roles of evolutionary experience and individual experience on parasite brood survival over the incubation period.
- table S3. Full ANOVA table of a Bernoulli GLM testing the roles of parasite treatment, evolutionary experience, and individual experience on host brood survival over the incubation period.
- table S4. The results of a Bernoulli GLM to test the roles of evolutionary experience and individual experience on rejection of parasite eggs over the first 2 hours.
- table S5. The results of a Bernoulli GLM to test the roles of evolutionary experience and individual experience on rejection of own eggs following experimental parasitism over the first 2 hours.
- table S6. The number of eggs rejected over 2 and 24 hours by experimental females.
- table S7. The results of a bivariate GLM to test the roles of evolutionary experience and individual experience on rejection of parasite eggs over the first 24 hours.

#### **Other Supplementary Material for this manuscript includes the following:**

(available at [advances.sciencemag.org/cgi/content/full/4/5/ear4380/DC1](https://advances.sciencemag.org/cgi/content/full/4/5/ear4380/DC1))

- movie S1 (.mp4 format). Undisturbed spawning of sympatric cichlid hosts, *Simochromis diagramma*.
- movie S2 (.mov format). Spawning of sympatric host *Simochromis diagramma* with repeated cuckoo catfish intrusions and spawning.
- movie S3 (.mp4 format). Undisturbed spawning of allopatric host *Haplochromis aeneaocolor* followed by cuckoo catfish intrusions and spawning.

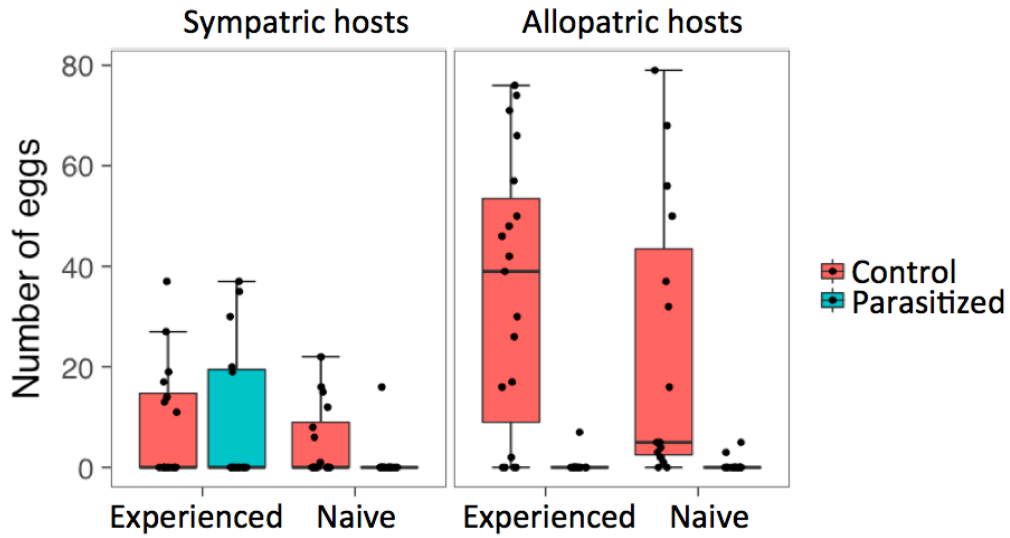

**fig. S1. The cost of experimental parasitism in terms of the size of host own brood.** The cost of experimental parasitism in terms of the size of host own brood. Median (line), interquartile range (box), non-outlier range (whiskers) and observed data points are plotted.

**table S1. Full analysis of variance (ANOVA) table for a Bernoulli GLM to test the roles of evolutionary experience and individual experience on rejection of parasite eggs over the first 24 hours.**

| Effect                                          | Estimate     | Std Error   | z            | P                 |
|-------------------------------------------------|--------------|-------------|--------------|-------------------|
| (Intercept)                                     | 2.64         | 1.04        | 2.55         | 0.0108            |
| Individual experience (ref naive)               | -0.77        | 1.28        | -0.60        | 0.5501            |
| <b>Evolutionary experience (ref allopatric)</b> | <b>-4.51</b> | <b>1.28</b> | <b>-3.51</b> | <b>&lt;0.0001</b> |
| Interaction                                     | -16.93       | 2776.67     | -0.01        | 0.9951            |

Bold text indicates effect with *P*-value below the generally accepted threshold of statistical significance of 0.05

**table S2. The results of a Bernoulli GLM to test the roles of evolutionary experience and individual experience on parasite brood survival over the incubation period.**

| Effect                                      | Estimate    | Std Error   | z           | P             |
|---------------------------------------------|-------------|-------------|-------------|---------------|
| (Intercept)                                 | -1.87       | 0.76        | -2.46       | 0.0137        |
| <b>Evolutionary experience (allopatric)</b> | <b>3.66</b> | <b>1.08</b> | <b>3.40</b> | <b>0.0007</b> |
| Individual experience (naive)               | -0.07       | 1.07        | -0.07       | 0.945         |
| Interaction                                 | 0.15        | 1.52        | 0.10        | 0.9192        |

Bold text indicates effect with *P*-value below the generally accepted threshold of statistical significance of 0.05

**table S3. Full ANOVA table of a Bernoulli GLM testing the roles of parasite treatment, evolutionary experience, and individual experience on host brood survival over the incubation period.**

| Effect                                    | d.f.     | Deviance     | P                 |
|-------------------------------------------|----------|--------------|-------------------|
| <b>Treatment</b>                          | <b>1</b> | <b>32.83</b> | <b>&lt;0.0001</b> |
| <b>Evolutionary experience</b>            | <b>1</b> | <b>4.43</b>  | <b>0.0353</b>     |
| Individual experience                     | 1        | 0.25         | 0.6143            |
| <b>Treatment by Individual experience</b> | <b>1</b> | <b>7.459</b> | <b>0.0063</b>     |
| Treatment by Evolutionary experience      | 1        | 1.399        | 0.2370            |
| Evolutionary by Individual experience     | 1        | 1.848        | 0.1740            |

Bold text indicates effect with *P*-value below the generally accepted threshold of statistical significance of 0.05

**table S4. The results of a Bernoulli GLM to test the roles of evolutionary experience and individual experience on rejection of parasite eggs over the first 2 hours.**

| <b>Effect</b>                  | <b>d.f.</b> | <b>Deviance</b> | <b><i>P</i></b>   |
|--------------------------------|-------------|-----------------|-------------------|
| Individual experience          | 1           | 0.29            | 0.5919            |
| <b>Evolutionary experience</b> | <b>1</b>    | <b>44.46</b>    | <b>&lt;0.0001</b> |
| Interaction                    | 1           | 0.00            | 1.0000            |

Bold text indicates effect with *P*-value below the generally accepted threshold of statistical significance of 0.05

**table S5. The results of a Bernoulli GLM to test the roles of evolutionary experience and individual experience on rejection of own eggs following experimental parasitism over the first 2 hours.**

| <b>Effect</b>                  | <b>d.f.</b> | <b>Deviance</b> | <b><i>P</i></b> |
|--------------------------------|-------------|-----------------|-----------------|
| <b>Individual experience</b>   | <b>1</b>    | <b>5.76</b>     | <b>0.0164</b>   |
| <b>Evolutionary experience</b> | <b>1</b>    | <b>6.28</b>     | <b>0.0122</b>   |
| Interaction                    | 1           | 0.20            | 0.6522          |

Bold text indicates effect with *P*-value below the generally accepted threshold of statistical significance of 0.05

**table S6. The number of eggs rejected over 2 and 24 hours by experimental females.**

|                                        | <b>Evolutionary<br/>contrast</b> | <b>Individual<br/>contrast</b> | <b>Total<br/>number of<br/>broods</b> | <b>Rejected<br/>eggs over<br/>2h</b> | <b>Rejected<br/>eggs over<br/>24h</b> |
|----------------------------------------|----------------------------------|--------------------------------|---------------------------------------|--------------------------------------|---------------------------------------|
| (a) Parasite eggs                      | Sympatric                        | Experienced                    | 15                                    | 12                                   | 13                                    |
|                                        |                                  | Naive                          | 15                                    | 10                                   | 14                                    |
|                                        | Allopatric                       | Experienced                    | 15                                    | 0                                    | 2                                     |
|                                        |                                  | Naive                          | 15                                    | 0                                    | 0                                     |
| (b) Host eggs<br>in parasitized broods | Sympatric                        | Experienced                    | 15                                    | 6                                    | 7                                     |
|                                        |                                  | Naive                          | 15                                    | 1                                    | 3                                     |
|                                        | Allopatric                       | Experienced                    | 15                                    | 1                                    | 2                                     |
|                                        |                                  | Naive                          | 15                                    | 0                                    | 0                                     |
| (c) Host eggs<br>in control broods     | Sympatric                        | Experienced                    | 16                                    | 2                                    | 7                                     |
|                                        |                                  | Naive                          | 16                                    | 4                                    | 8                                     |
|                                        | Allopatric                       | Experienced                    | 15                                    | 0                                    | 0                                     |
|                                        |                                  | Naive                          | 15                                    | 0                                    | 1                                     |

**table S7. The results of a bivariate GLM to test the roles of evolutionary experience and individual experience on rejection of parasite eggs over the first 24 hours.**

| <b>Effect</b>                  | <b>d.f.</b> | <b>Deviance</b> | <b><i>P</i></b>   |
|--------------------------------|-------------|-----------------|-------------------|
| Individual experience          | 1           | 2.11            | 0.1462            |
| <b>Evolutionary experience</b> | <b>1</b>    | <b>66.67</b>    | <b>&lt;0.0001</b> |
| Interaction                    | 1           | 2.70            | 0.1002            |

Bold text indicates effect with *P*-value below the generally accepted threshold of statistical significance of 0.05
